# Supplementary material for: Molecular Diagnostic Approaches for potato virus Y and tobacco mosaic virus in tobacco plants
Source: Research Square preprint supplement (doi:10.21203/rs.3.rs-6253622/v1), 2025-04-18
Supplement: Supplementary file 1 [file a0f3ce2cbcafbe49c37ec9a3.docx]

**Supplementary Material 1: Standard Modified dsRNA Protocol**

1. Put 5 ml 1 x STE; 1 ml 10% SDS; 6 ml STE-saturated phenol into a 15ml centrifuge tube.

2. Chill 3.5 g of tissue with liquid nitrogen. Grind into fine powder with pre-chilled mortar and pestle. Transfer powder to 15 ml centrifuge tube. Shake on orbital shake for 20 minutes.

3. Centrifuge in SS34 rotor for 30 minutes at 8000 rpm (7740g).

4. Collect supernatant in clean centrifuge tube, keeping track of volume. Adjust volume to 10 ml 1 X STE.

5. Add 2.1 ml 95% ethanol to supernatant to adjust EtOH concentration to 16.5% (this is the critical step).

6. Prepare CF-11 columns by plugging a 30 ml disposable syringe barrel with a miracloth or Whatman filter paper disk. Suspend 1.25 g CF-11 cellulose powder in 12.5 ml 1 X STE + 16.5% EtOH. Pour slurry into syringe barrel and allow to drip completely.

7. Add sample to column and allow to drip completely.

8. Wash column 3X with 15 ml of 1 X STE + 16.5% EtOH.

9. Elute column by the addition of three 2.5 ml volumes of 1 X STE. Collect only the second and third fractions. Check final volume with serological pipette.

10. Precipitate the dsRNA by the addition of 0.1 volume 3M sodium acetate pH 5.5. Add 2.5 volumes of 95% EtOH. Chill in -20°C freezer overnight or -80°C freezer overnight or -80°C freezer for 30 minutes.

11. Pellet the dsRNA by centrifugation in SS34 rotor for 30 minutes at 8000 rpm.

12. Wash pellet with 12.5 ml 70% EtOH. Spin at 8000 rpm for 10 min. Air dry thoroughly or place in SpeedVac.

13. Resuspend pellet in 100 µl 10 mM Tris-Cl pH 8.0 containing tracking dye (bromophenol blue or bromothymol blue).
